# Supplementary material for: Inferring dynamic gene regulatory networks in cardiac differentiation through the integration of multi-dimensional data
Source: PubMed Central journal article supplement (PMC4359553; doi:10.1186/s12859-015-0460-0), 2015-03-07

# Supplementary Figure 1

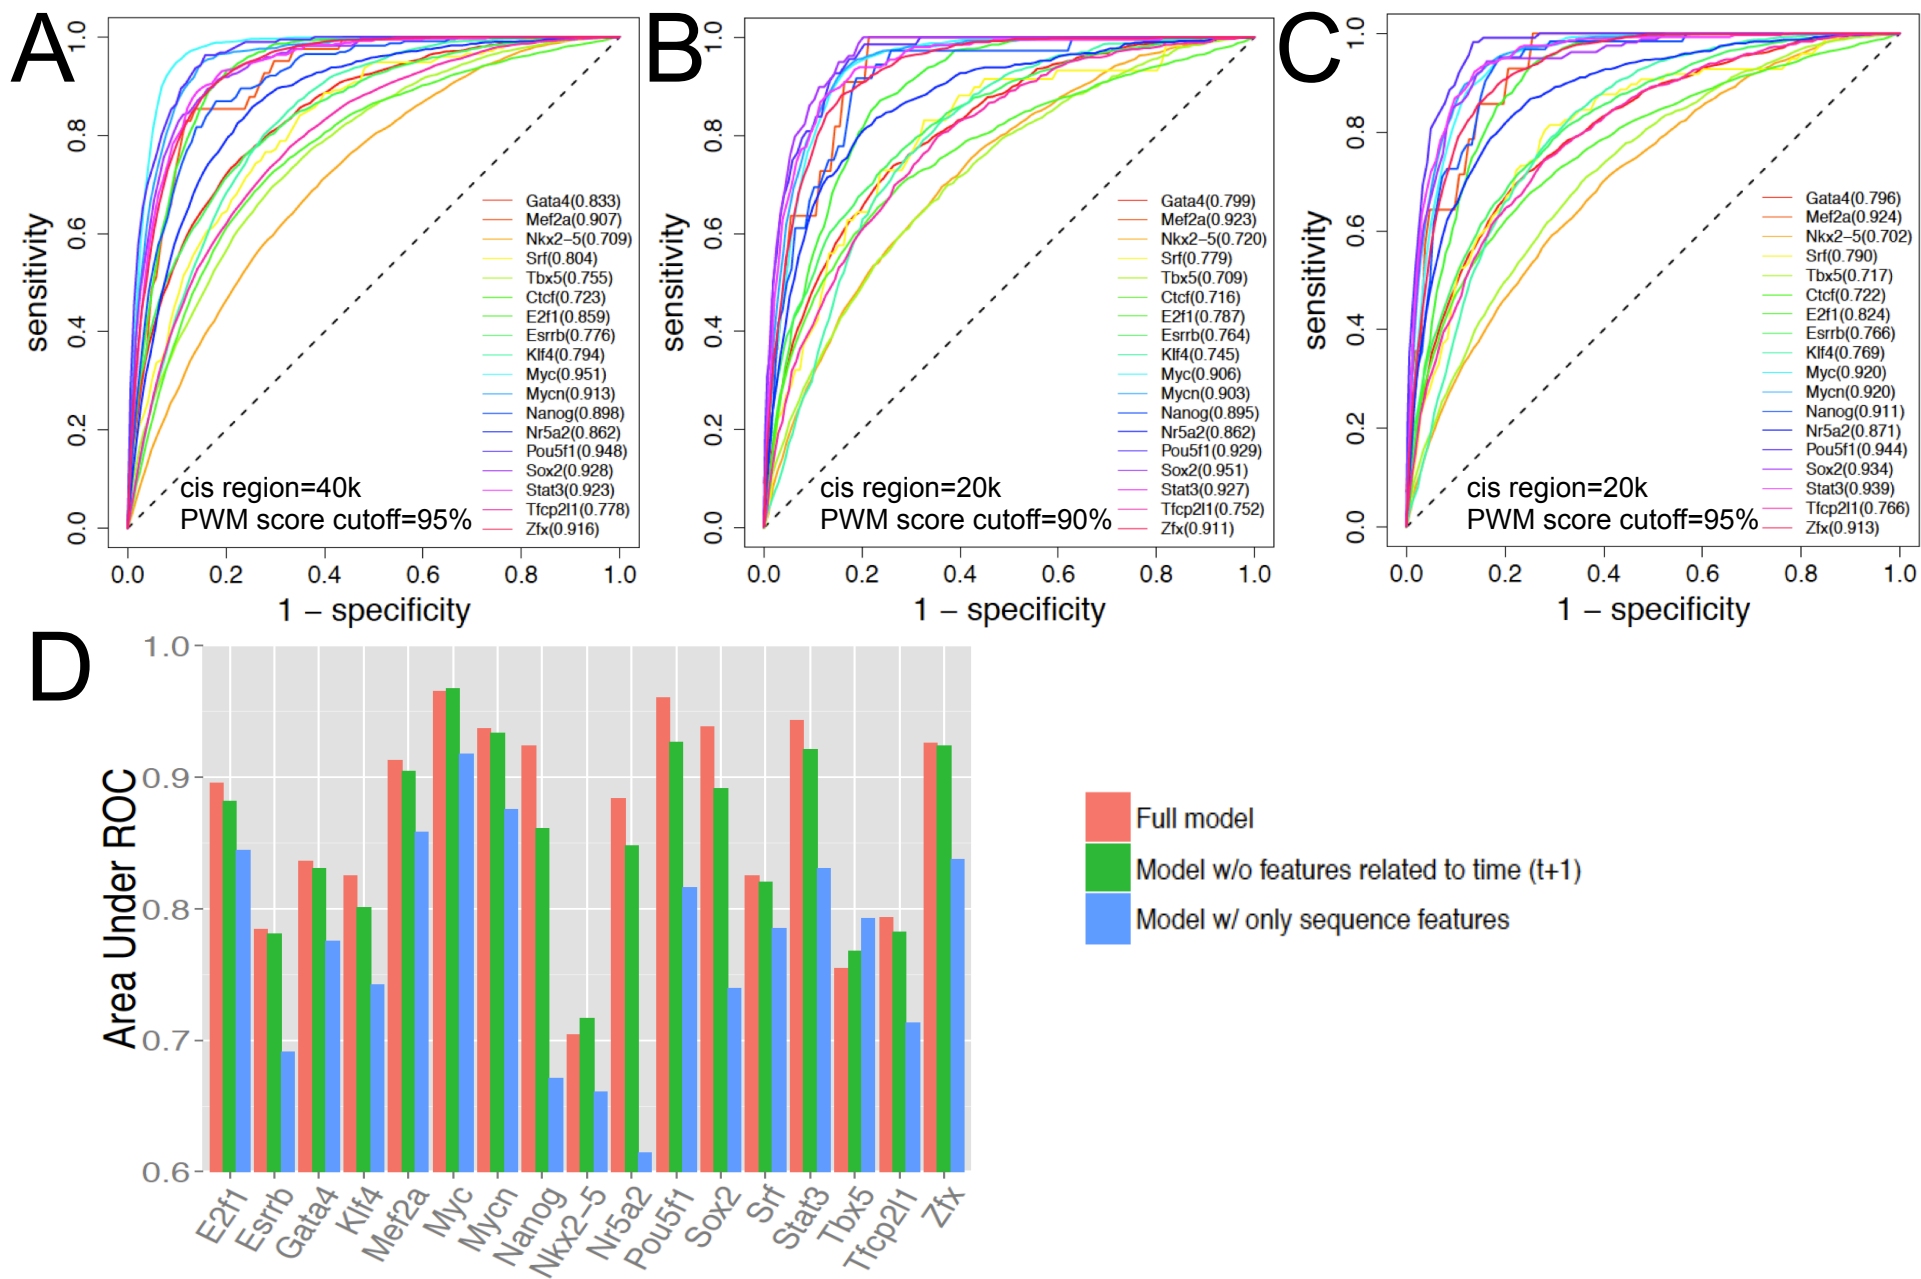

# Supplementary Figure 2

## A

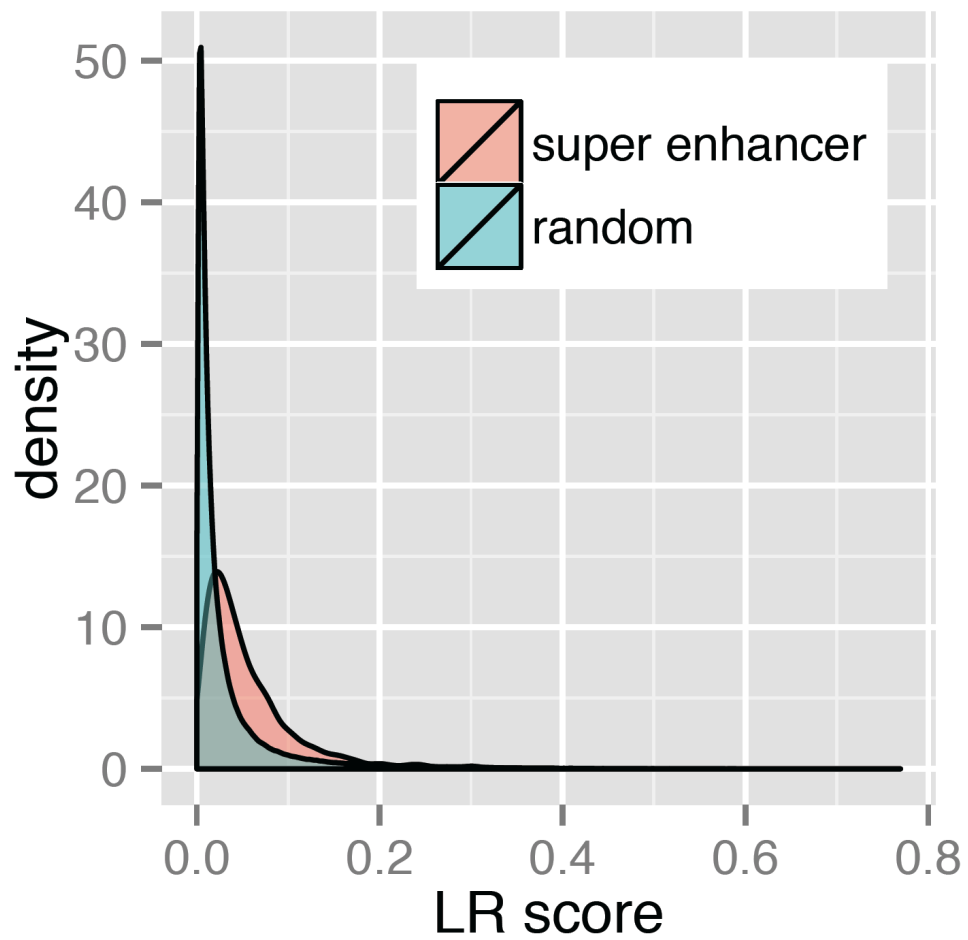

## B

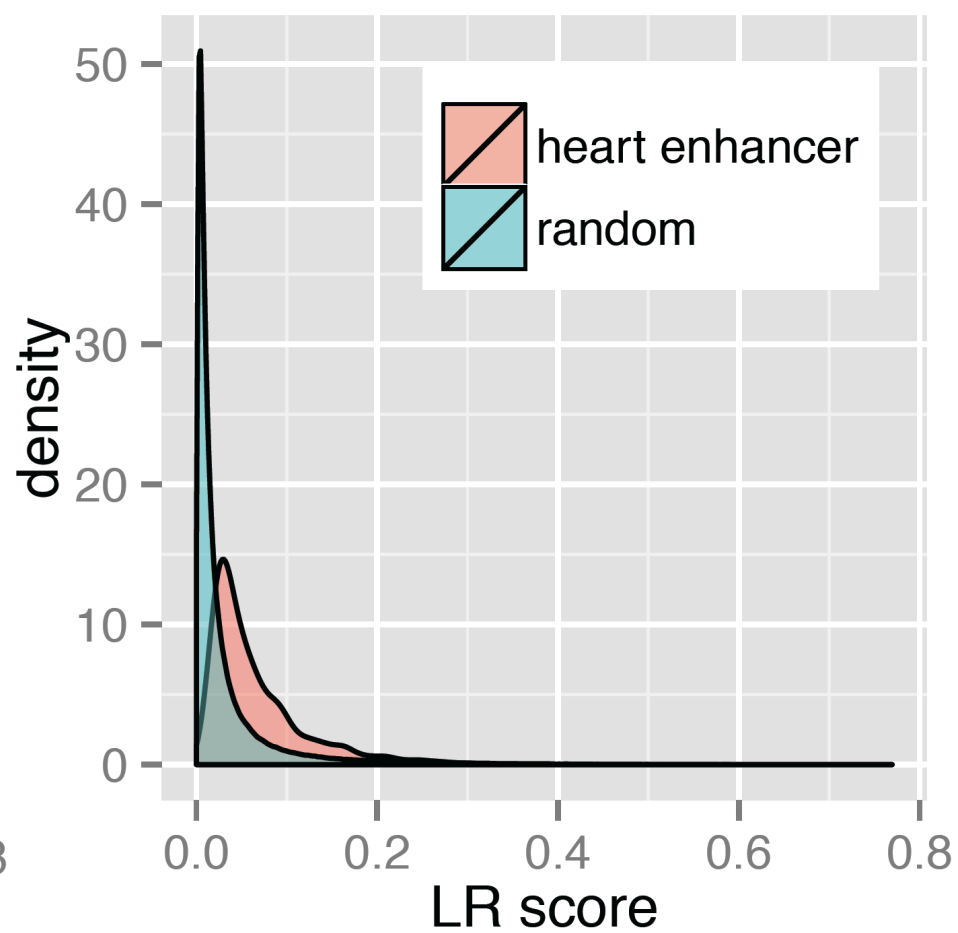

# Supplementary Figure 3

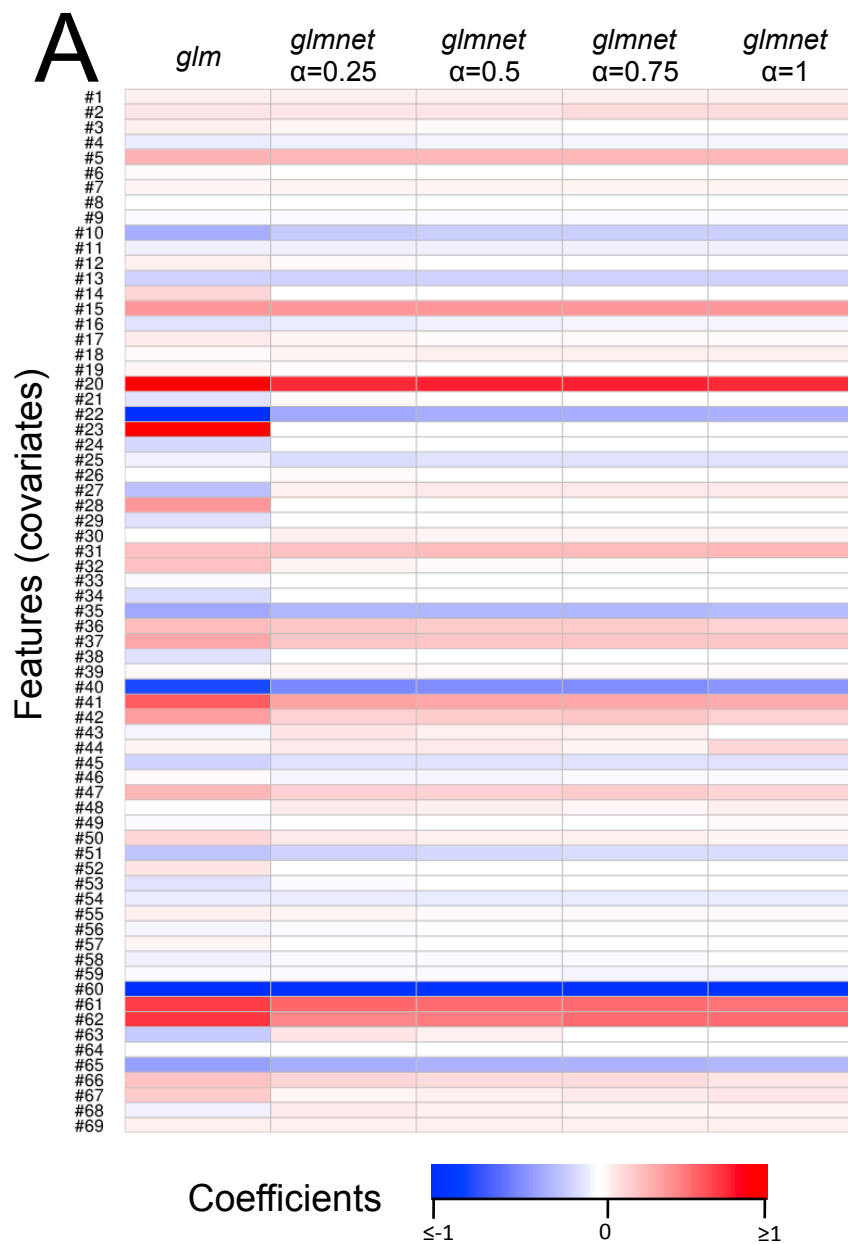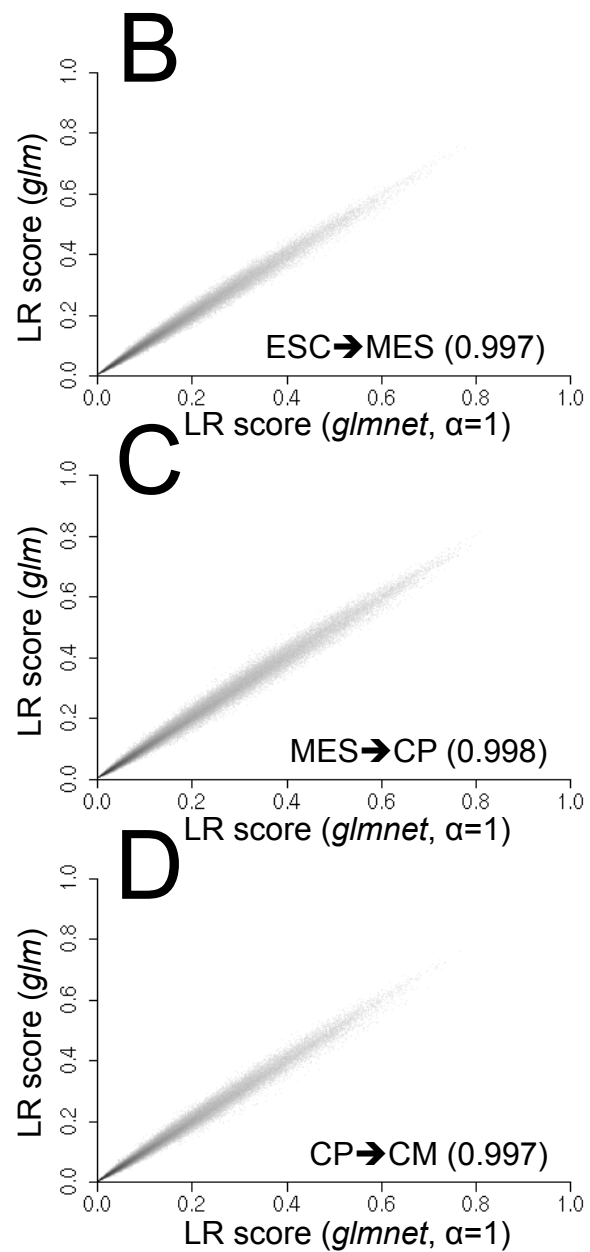

Supplementary Figure 4

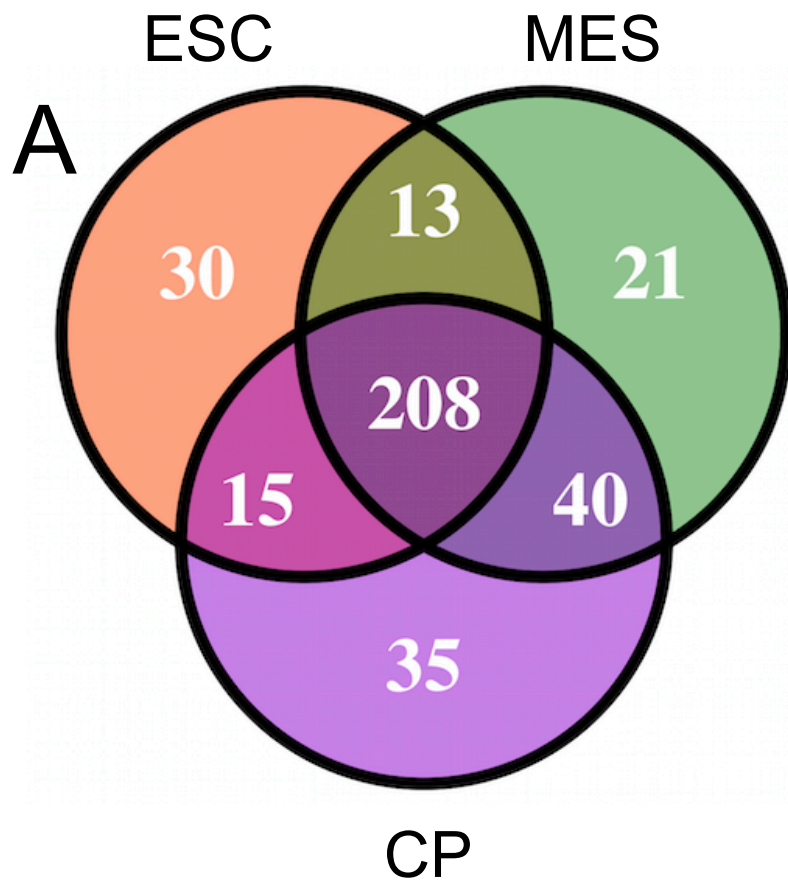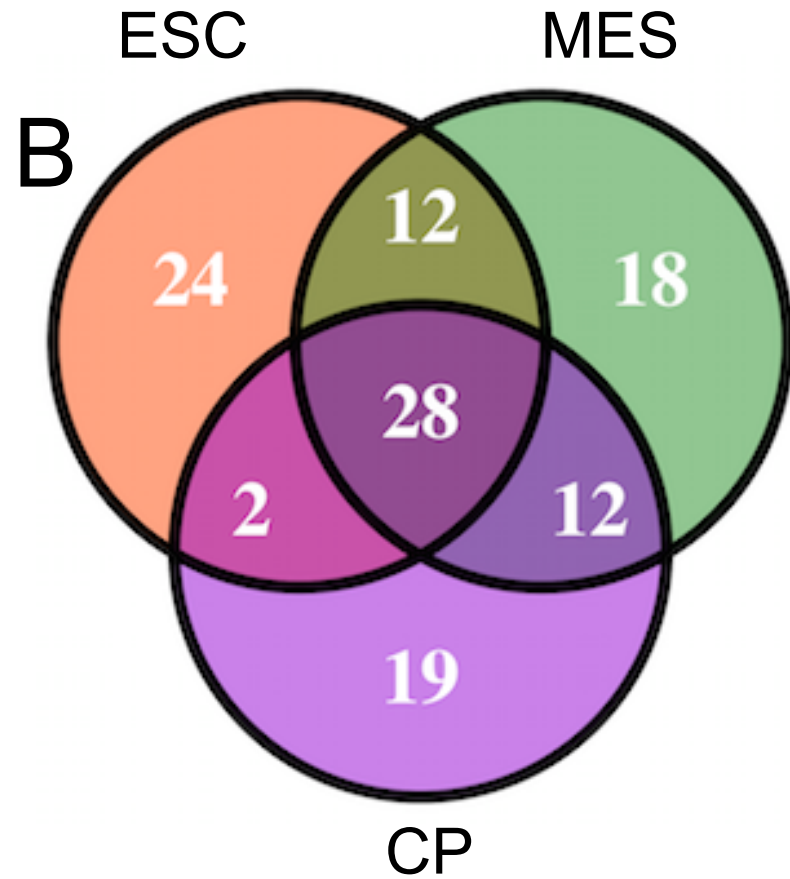

# Supplementary Figure 5

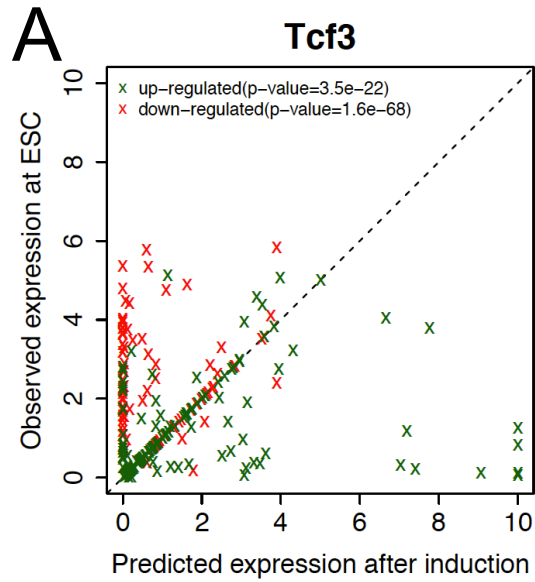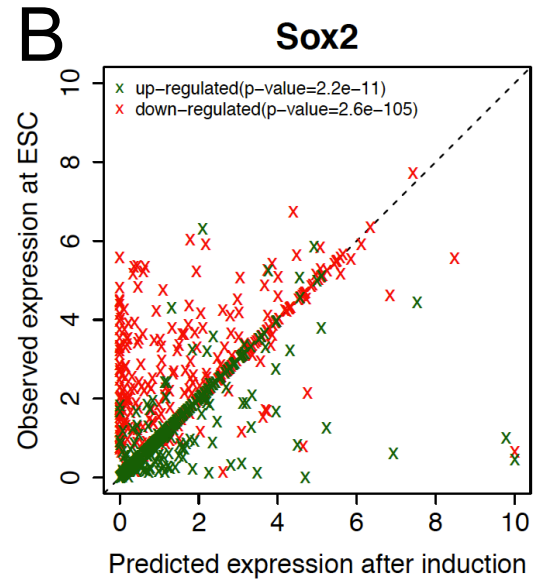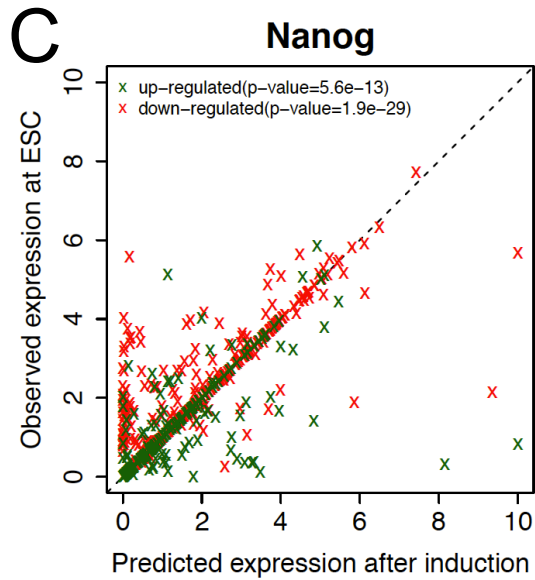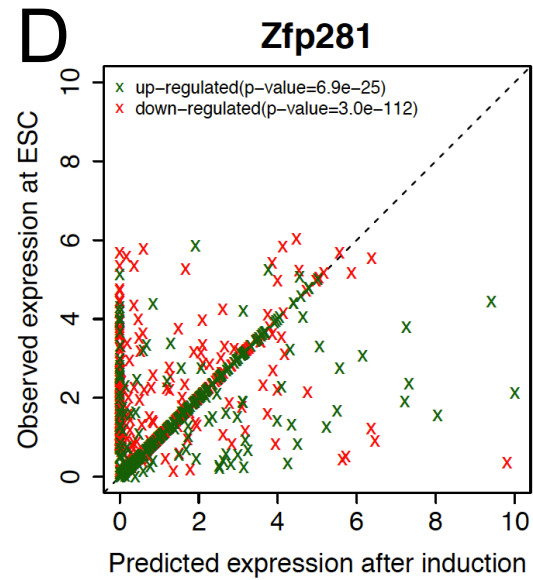

# Supplementary Figure 6A

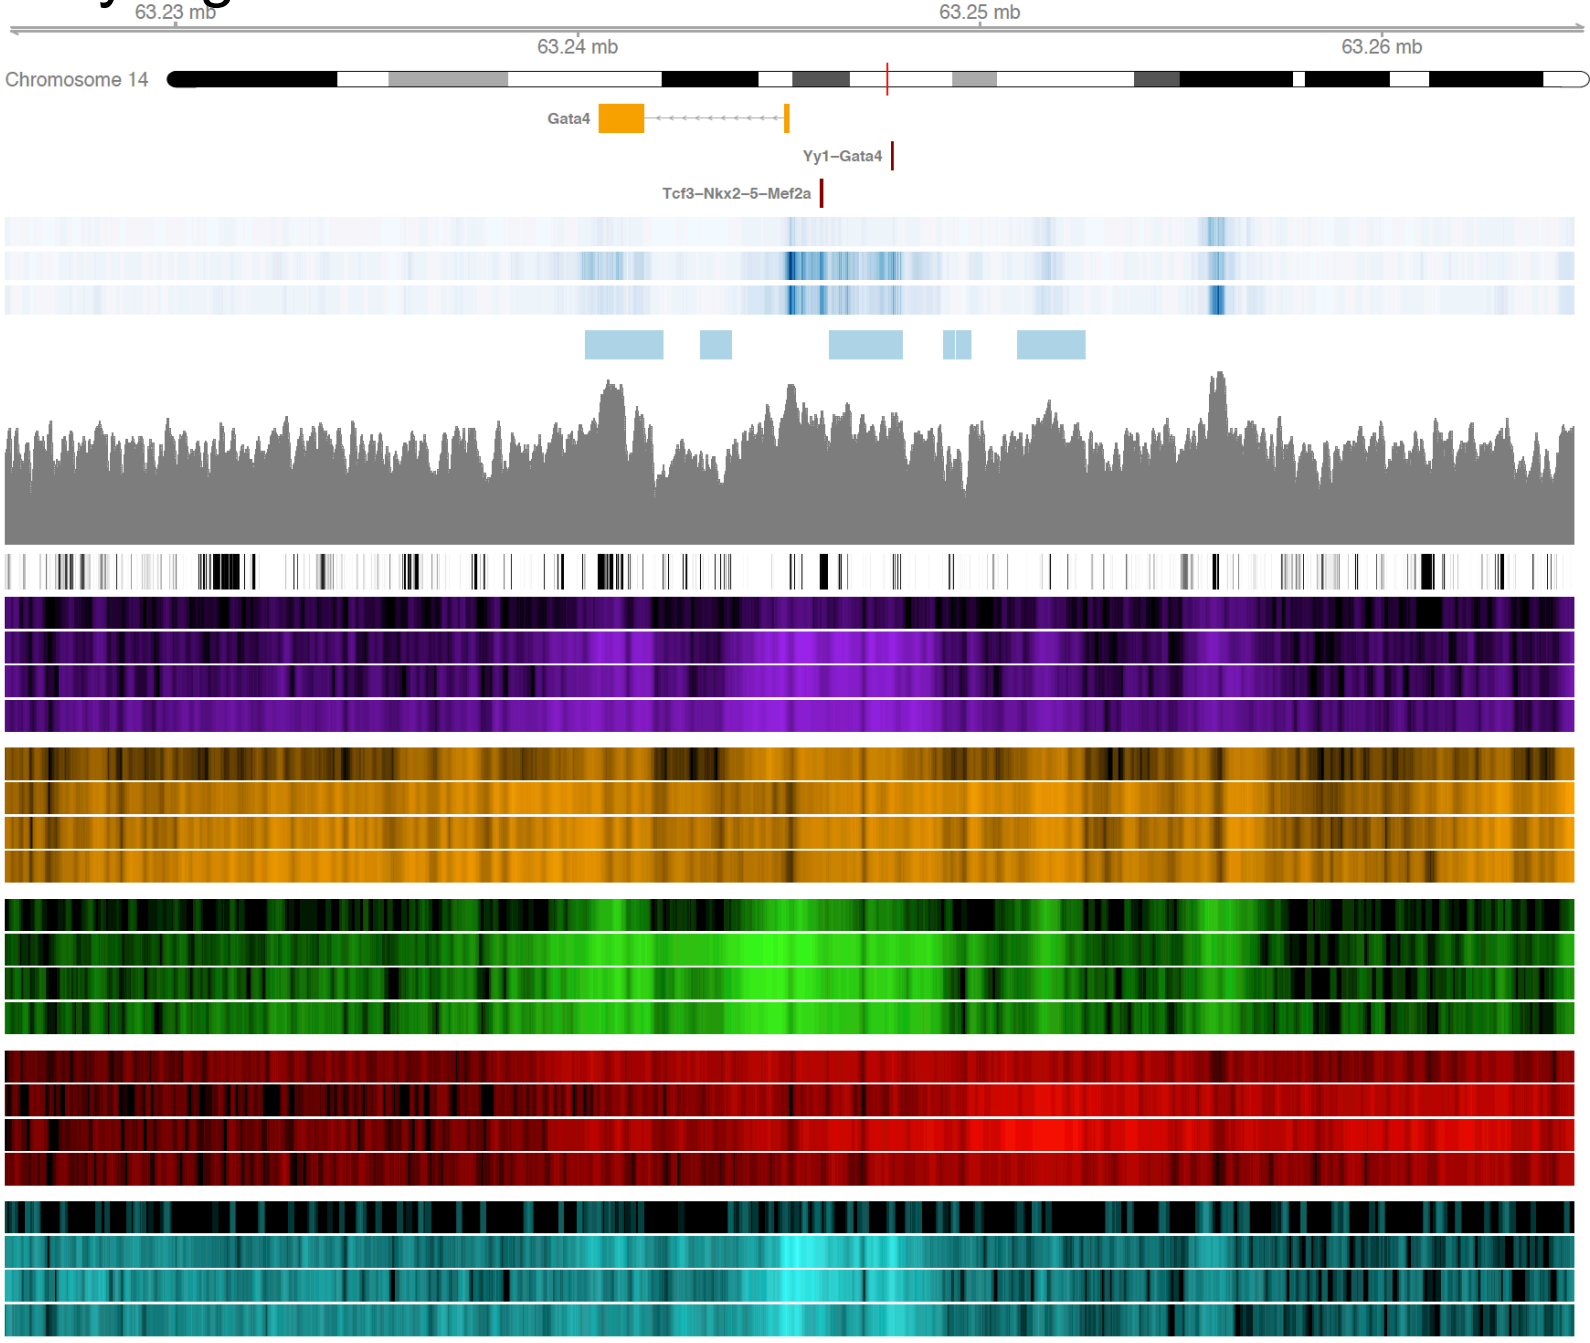

# Supplementary Figure 6B

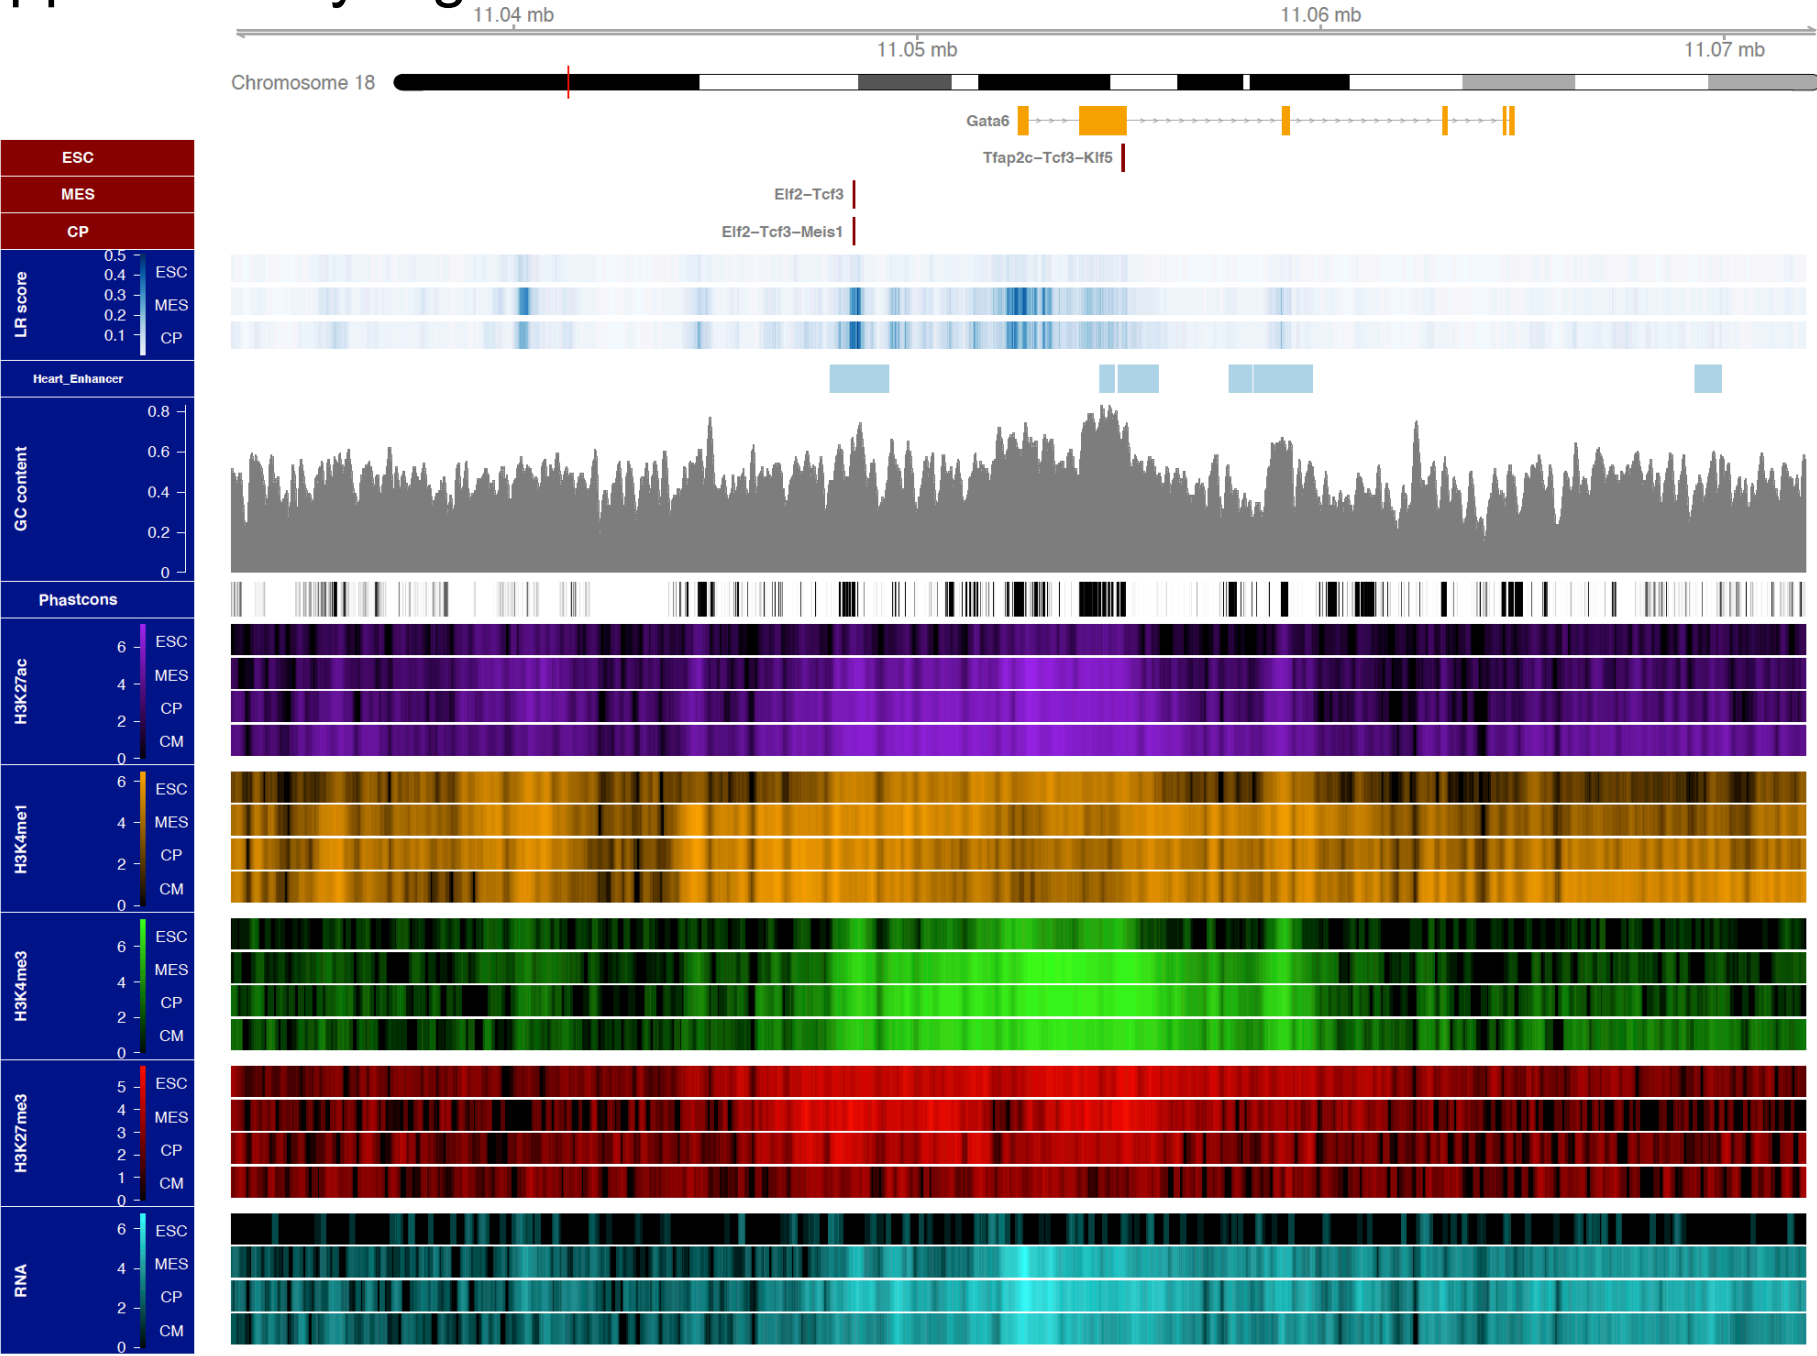

# Supplementary Figure 6C

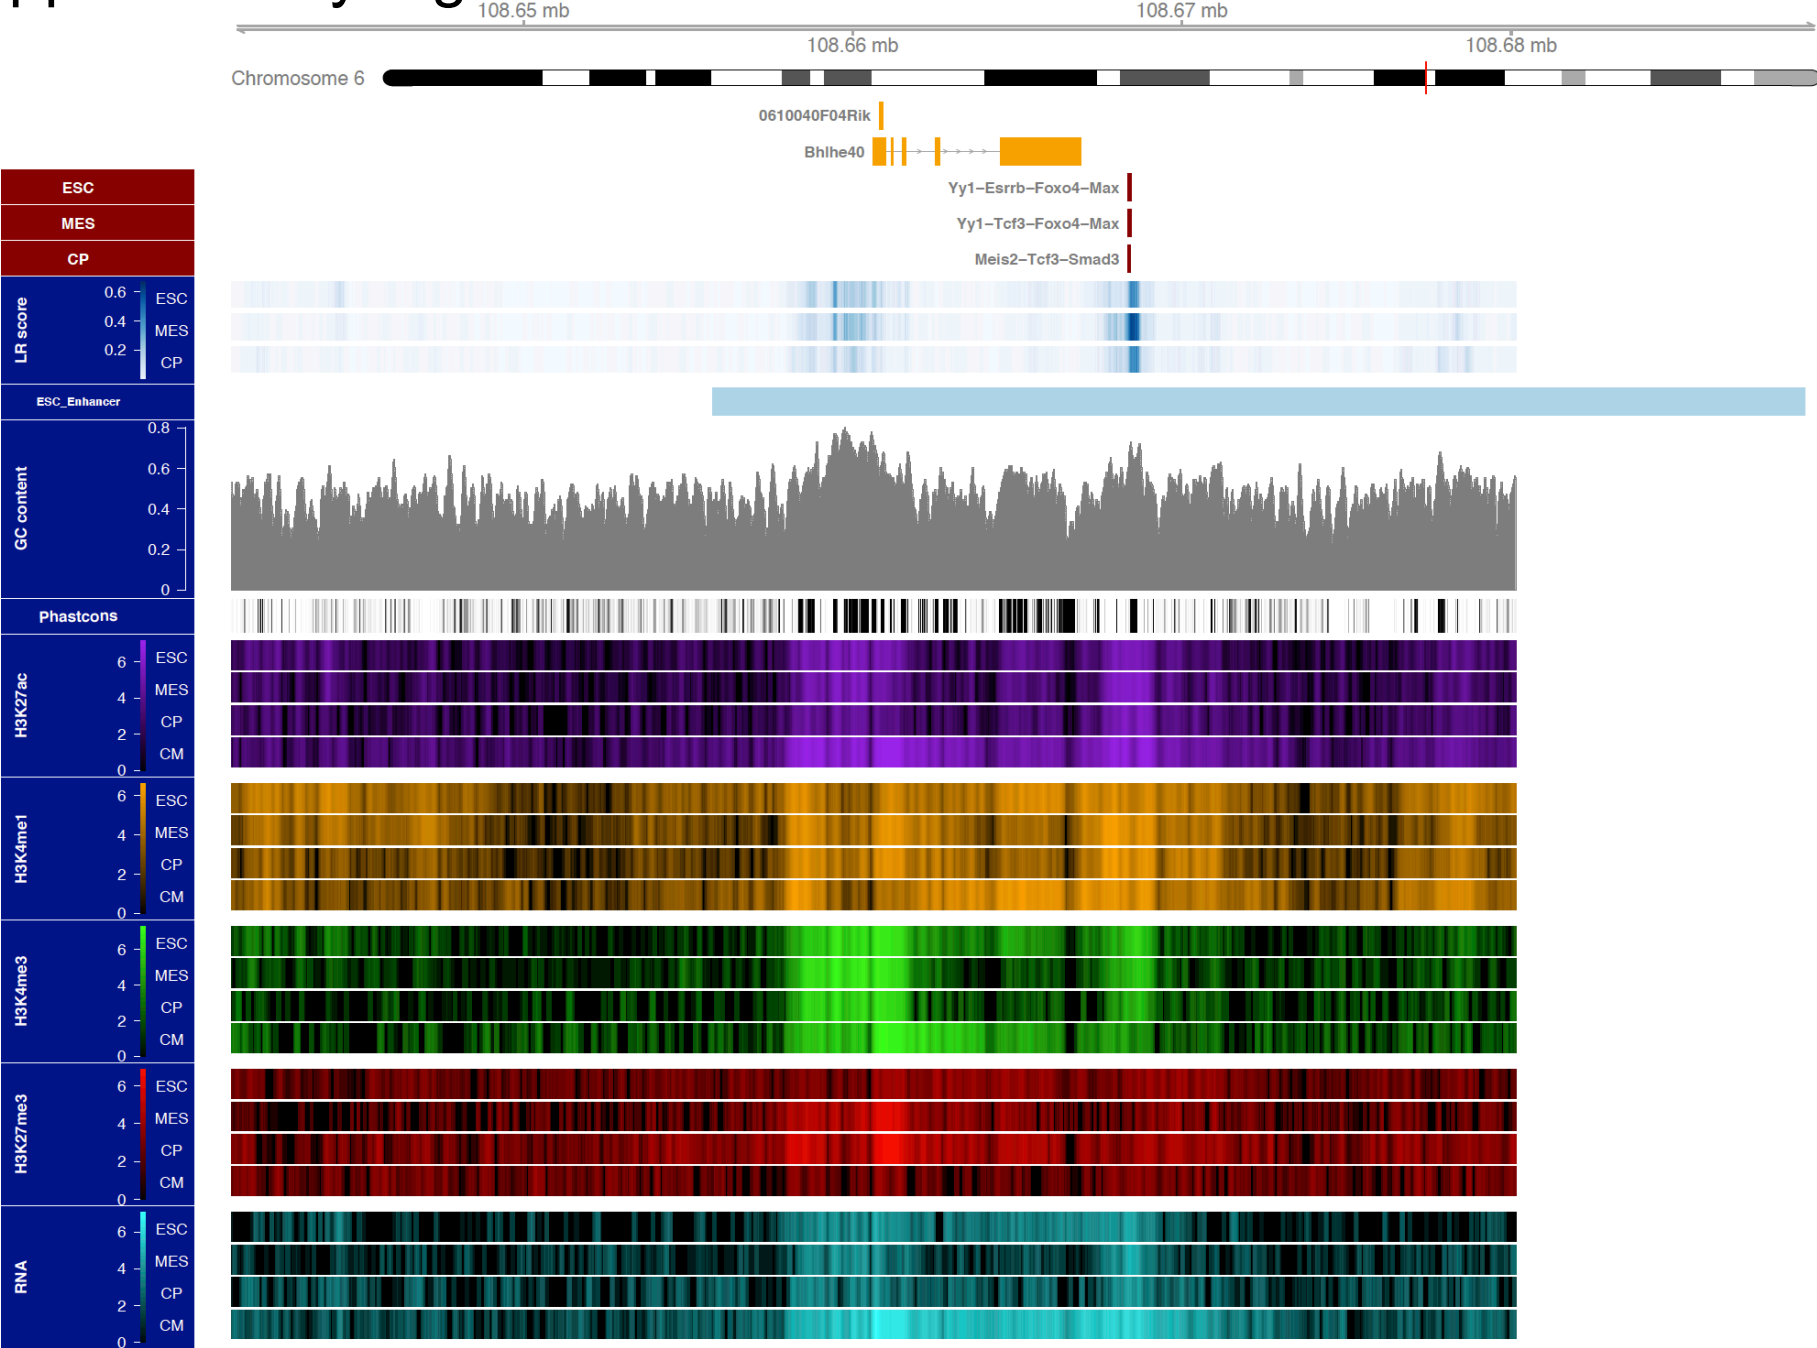



# Supplementary Figure 7

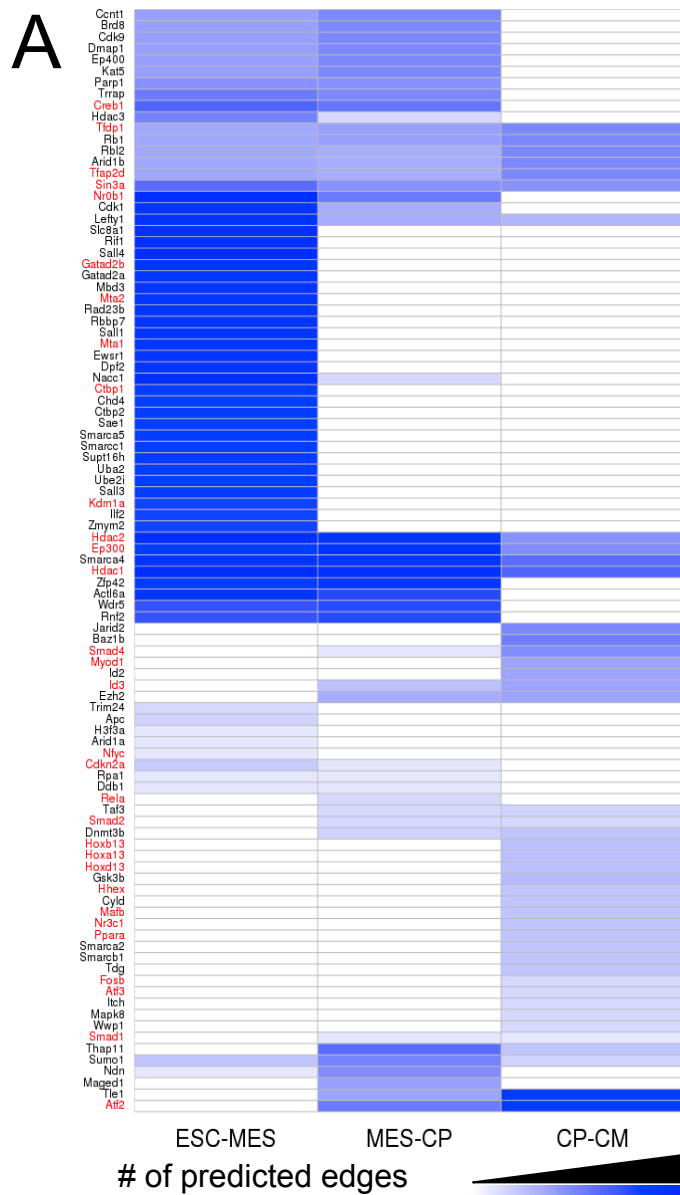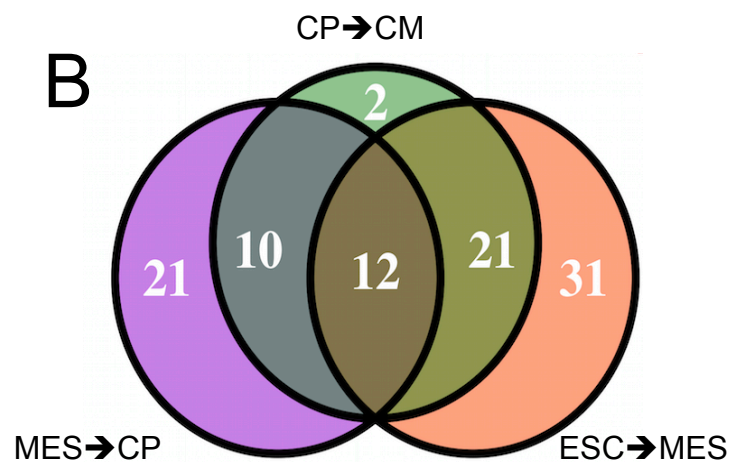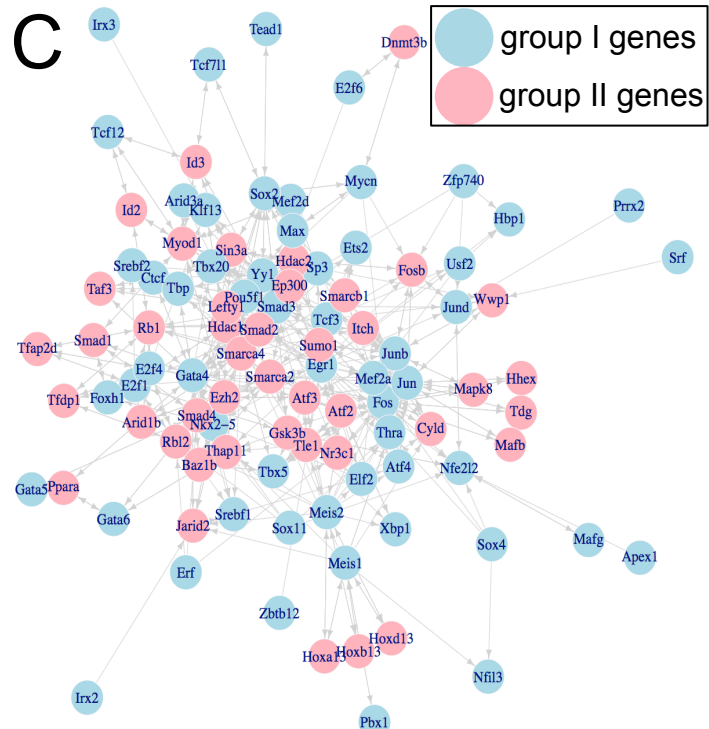

Supplement: 12859_2015_460_MOESM1_ESM.pdf [file 12859_2015_460_MOESM1_ESM.pdf]
